# Supplementary material for: Identification of a BTV-Strain-Specific Single Gene That Increases Culicoides Vector Infection Rate
Source: MDPI journal article supplement (doi:10.3390/v13091781), 2021-09-07
Supplement: s1 [file s1]

# Identification of a BTV-Strain-Specific Single Gene That Increases *Culicoides* Vector Infection Rate

Honorata M. Ropiak, Simon King, Marc Guimerà Busquets, Kerry Newbrook, Gillian D. Pullinger, Hannah Brown, John Flannery, Simon Gubbins, Carrie Batten, Paulina Rajko-Nenow <sup>\*,†</sup> and Karin E. Darpel <sup>†</sup>

The Pirbright Institute, Ash Road, Pirbright, Woking, Surrey GU24 0NF, UK;

\* Correspondence: paulina.rajko-nenow@pirbright.ac.uk

† These authors contributed equally to this work.

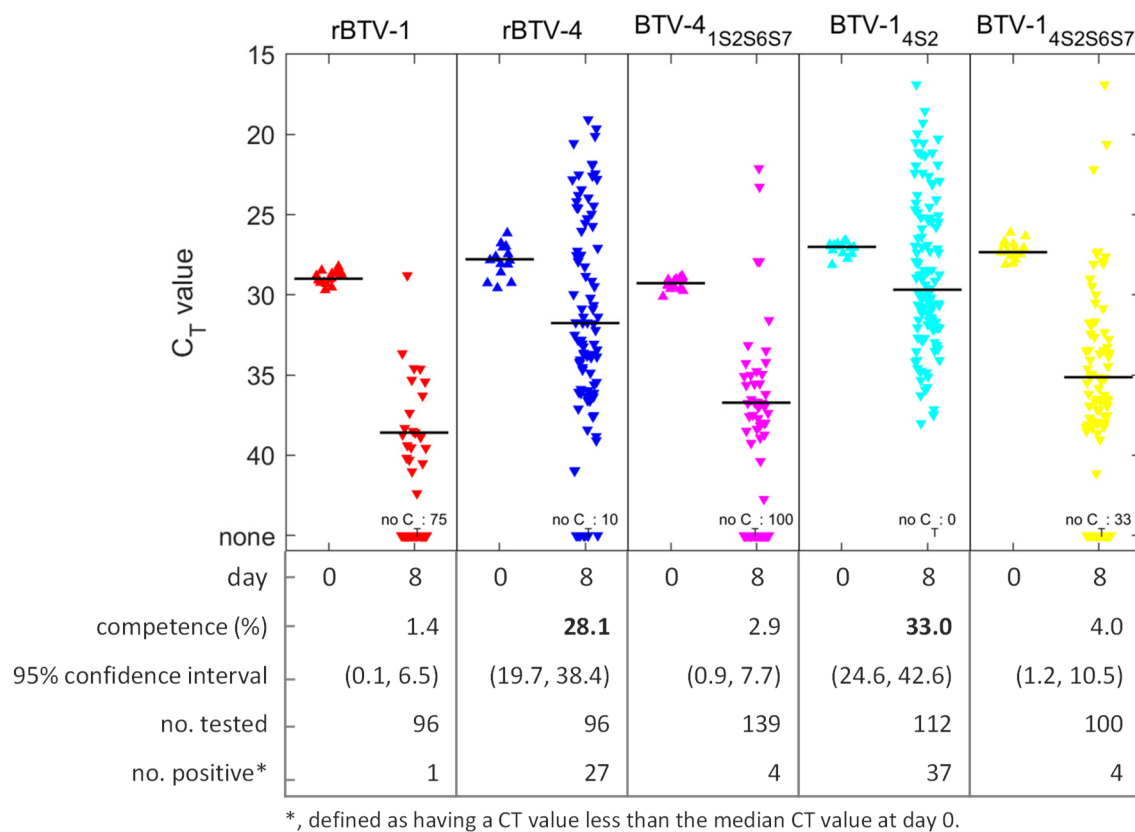

**Figure S1.** Reverse-engineered and reassortant BTV strain C<sub>T</sub> values in *C. sonorensis* after feeding. Individuals were tested either immediately after feeding (day 0) or after incubation for 8 days at 25 °C (day 8). Symbols depict the C<sub>T</sub> values for individual insects and horizontal bars depict the median C<sub>T</sub> value (excluding those individuals with no C<sub>T</sub> value). C<sub>T</sub> values were obtained from RT-qPCR assays of one independent experiment for each strain. Comparison amongst strains was carried out using a binomial-family generalized linear model with a logit link function. *Note:* Figure placed here for comparison to literature data, which is usually expressed in observed C<sub>T</sub> values.

**Table S1.** Sequences of cloning primers. The upstream (forward) primers contained a T7 RNA polymerase promoter sequence and a restriction site for unidirectional cloning, while the downstream (reverse) primers contained restriction sites for cloning and for linearization at the 3' end of the segment [45].

| <b>BTV clone, segment</b> | <b>Sequence (5'-3')</b>                                |
|---------------------------|--------------------------------------------------------|
| <b>BTV-1 MOR2006/06</b>   |                                                        |
| Seg-1 forward             | TCTAGCGGATCCTAATACGACTCACTATAGTTAAAATGCAATGGTCGCAATC   |
| Seg-1 reverse             | TACAGTAAGCGGCCGCGTCTCAGTAAGTGTAATGCGGCGCGTGC           |
| Seg-2 forward             | TCTAGCGAATTCTAATACGACTCACTATAGTTAAAATAGTAGCGCGATGGATG  |
| Seg-2 reverse             | TACAGTAAGCGGCCGCGTCTCAGTAAGTCTAATAGTGCGCGGATC          |
| Seg-3 forward             | TCTAGCGAATTCTAATACGACTCACTATAGTTAAATTTCCGTAGCCATGGCTG  |
| Seg-3 reverse             | TACAGTAAGCGGCCGCGTCTCAGTAAGTGTGTTCCTGCTGCCGC           |
| Seg-4 forward             | TCTAGCGAATTCTAATACGACTCACTATAGTTAAAACATGCCTGAGCCACACG  |
| Seg-4 reverse             | CGTAAGCGGCCGCGGTCTCAGTAAGTTGTACATGCCCCCTC              |
| Seg-5 forward             | TCTAGCGAATTCTAATACGACTCACTATAGTTAAAAAAGTTCTCTAGTTGGC   |
| Seg-5 reverse             | TACAGTAAGCGGCCGCGTCTCAGTAAGTTGAAAAGTTCTAGTAGAGTG       |
| Seg-6 forward             | CTAGCGAATTCTAATACGACTCACTATAGTTAAAAAGTGCACCCTTAGCGAA   |
| Seg-6 reverse             | TACAGTAAGCGGCCGCGGTCTCAGTAAGTGTAAGTGCTTCCCGTCGC        |
| Seg-7 forward             | TCTAGCGAATTCTAATACGACTCACTATAGTTAAAAATCTATAGAGATGGACA  |
| Seg-7 reverse             | TACAGTAAGCGGCCGCGGTCTCAGTAAGTGTAATCTAAGAGACGTTTG       |
| Seg-8 forward             | TCTAGCGGATCCTAATACGACTCACTATAGTTAAAAAATCCTTGAGTCATGGAG |
| Seg-8 reverse             | CAGTAAGCGGCCGCGTCTCAGTAAGTGTAATTTCCCCCTAACC            |
| Seg-9 forward             | TCTAGCGAATTCTAATACGACTCACTATAGTTAAAAAATCGCATATGTCAGCTG |
| Seg-9 reverse             | TACAGTAAGCGGCCGCGTCTCAGTAAGTGTAATAATCGCCCTACGTCA       |
| Seg-10 forward            | TCTAGCGAATTCTAATACGACTCACTATAGTTAAAAAGTGTGCTGCCATGCT   |
| Seg-10 reverse            | TACAGTAAGCGGCCGCGTCTCAGTAAGTGTTAGCGCCGCATACCTC         |
| <b>BTV-4 MOR2004/02</b>   |                                                        |
| Seg-1 forward             | GTGATGGATCCTAATACGACTCACTATAGTTAAAATGCAATGGTCGCAAT     |
| Seg-1 reverse             | GGTATGCGGCCGCGGTCTCAGTAAGTGTAATGCGGCGCGTG              |
| Seg-2 forward             | GTGATGAATTCTAATACGACTCACTATAGTTAAAAGAGTGTCACCAATGG     |
| Seg-2 reverse             | GGTATGCGGCCGCGGTCTCAGTAAGTGTAAGAGGCCACAGG              |
| Seg-3 forward             | GTGATGAATTCTAATACGACTCACTATAGTTAAATTTCCGTAGCCATGG      |
| Seg-3 reverse             | GGTATGCGGCCGCGGTCTCAGTAAGTGTTCCCGCTGCCG                |

|                |                                                    |
|----------------|----------------------------------------------------|
| Seg-4 forward  | GTGATGGATCCTAATACGACTCACTATAGTTAAAACATGCCTGAGCCACA |
| Seg-4 reverse  | GGTATGCGGCCGCGGTCTCAGTAAGTTGTACATGCCCCCCT          |
| Seg-5 forward  | GTGATGAATTCTAATACGACTCACTATAGTTAAAAAAGTTCTCTAGTTG  |
| Seg-5 reverse  | GGTATGCGGCCGCGGTCTCAGTAAGTTGAAAAGTTCTAGTAG         |
| Seg-6 forward  | GTGATGAATTCTAATACGACTCACTATAGTTAAAAAGTGTTCTCCTACT  |
| Seg-6 reverse  | GGTATGCGGCCGCGGTCTCAGTAAGTGTAAGCTTCTCCCTCG         |
| Seg-7 forward  | GTGATGAATTCTAATACGACTCACTATAGTTAAAAATCTATAGAGATGG  |
| Seg-7 reverse  | GGTATGCGGCCGCGAAGACCAGTAAGTGTAATCTAAGAGACG         |
| Seg-8 forward  | GTGATGGATCCTAATACGACTCACTATAGTTAAAAAATCCTCGAGTCATG |
| Seg-8 reverse  | GGTATGCGGCCGCGGTCTCA GTAAGTGTA AAAATCCCCCCT        |
| Seg-9 forward  | GTGATGAATTCTAATACGACTCACTATAGTTAAAAAATCGCATATGTCAG |
| Seg-9 reverse  | GGTATGCGGCCGCGGTCTCAGTAAGTGTA AAAATCGCCCTACG       |
| Seg-10 forward | GTGATGAATTCTAATACGACTCACTATAGTTAAAAAGTGTCGCTGCCATG |
| Seg-10 reverse | GGTATGCGGCCGCGGTCTCAGTAAGTG GTAGCGCCGCATA          |

**Table S2.** Restriction enzymes used for reverse genetics.

| <b>BTV clone, segment</b> | <b>Upstream site</b> | <b>Downstream site</b> |
|---------------------------|----------------------|------------------------|
| <b>BTV-1 MOR2006/06</b>   |                      |                        |
| Seg-1                     | BamHI                | BsmBI                  |
| Seg-2                     | EcoRI                | BsmBI                  |
| Seg-3                     | EcoRI                | BsmBI                  |
| Seg-4                     | BamHI                | BsaI                   |
| Seg-5                     | EcoRI                | BsmBI                  |
| Seg-6                     | EcoRI                | BsaI                   |
| Seg-7                     | EcoRI                | BsaI                   |
| Seg-8                     | BamHI                | BsmBI                  |
| Seg-9                     | EcoRI                | BsmBI                  |
| Seg-10                    | EcoRI                | BsmBI                  |
| <b>BTV-4 MOR2004/02</b>   |                      |                        |
| Seg-1                     | BamHI                | BsaI                   |
| Seg-2                     | EcoRI                | BsaI                   |
| Seg-3                     | EcoRI                | BsmBI                  |
| Seg-4                     | BamHI                | BsaI                   |
| Seg-5                     | EcoRI                | BsmBI                  |
| Seg-6                     | EcoRI                | BsmBI                  |
| Seg-7                     | EcoRI                | BbsI (Bpil)            |
| Seg-8                     | BamHI                | BsmBI                  |
| Seg-9                     | EcoRI                | BsmBI                  |
| Seg-10                    | EcoRI                | BsmBI                  |

**Table S3.** Rescued and reassortant BTV strains [BSR3 passage] deposited in the Orbivirus Reference Collection (ORC) at the Pirbright Institute, UK ([https://www.reoviridae.org/dsRNA\\_virus\\_proteins/ReoID/rescued%20BTV.html](https://www.reoviridae.org/dsRNA_virus_proteins/ReoID/rescued%20BTV.html)); where reverse engineered rBTV-1 is derivative of wtBTV-1 MOR2006/06 and rBTV-4 is derivative of wtBTV-4 MOR2004/02.

| ORC ref.<br>number <sup>a</sup> | Virus name <sup>b</sup>  | Genome segment(s) <sup>c</sup> |       |       |       |       |       |       |       |       |        |
|---------------------------------|--------------------------|--------------------------------|-------|-------|-------|-------|-------|-------|-------|-------|--------|
|                                 |                          | Seg-1                          | Seg-2 | Seg-3 | Seg-4 | Seg-5 | Seg-6 | Seg-7 | Seg-8 | Seg-9 | Seg-10 |
| BTV-RV0010*                     | rBTV-4                   |                                |       |       |       |       |       |       |       |       |        |
| BTV-RV0002                      | BTV-4 <sub>1S3</sub>     |                                |       | 1     |       |       |       |       |       |       |        |
| BTV-RV0007                      | BTV-4 <sub>1S9</sub>     |                                |       |       |       |       |       |       |       | 1     |        |
| BTV-RV0022*                     | BTV-4 <sub>1S2S6S7</sub> |                                | 1     |       |       |       | 1     | 1     |       |       |        |
| BTV-RV0042*                     | rBTV-1                   |                                |       |       |       |       |       |       |       |       |        |
| BTV-RV0021*                     | BTV-1 <sub>4S2</sub>     |                                | 4     |       |       |       |       |       |       |       |        |
| BTV-RV0035                      | BTV-1 <sub>4S3</sub>     |                                |       | 4     |       |       |       |       |       |       |        |
| BTV-RV0040                      | BTV-1 <sub>4S9</sub>     |                                |       |       |       |       |       |       |       | 4     |        |
| BTV-RV0038*                     | BTV-1 <sub>4S2S6S7</sub> |                                | 4     |       |       |       | 4     | 4     |       |       |        |

<sup>a</sup>, all strains used in this study were after additional propagation to cell passage: BSR4.

<sup>b</sup>, the first section of the name refers to the BTV backbone, with the second subscribed section referring to the heterologous segment(s). In this study, all strains were used after additional propagation to cell passage: BSR4

<sup>c</sup>, white-boxes indicate those genome segments derived from wtBTV-1 MOR2006/06; grey-boxes indicate genome segments derived from wtBTV-4 MOR2004/02.

\*, used in this study for in vivo oral infection of *C. sonorensis* experiments at cell passage: BSR4.

**Table S4.** Genome copy numbers obtained from BTV replication kinetics study for wild type (wtBTV-1 and wt-BTV-4) and reverse engineered (rBTV-1 and rBTV-4) strains.

| dpi | wtBTV-1              |                      |   | wtBTV-4              |                      |   | rBTV-1               |                      |   | rBTV-4               |                      |    |
|-----|----------------------|----------------------|---|----------------------|----------------------|---|----------------------|----------------------|---|----------------------|----------------------|----|
|     | mean gc              | sd                   | n  |
| 0   | 3.41×10 <sup>2</sup> | 1.37×10 <sup>2</sup> | 6 | 5.98×10 <sup>3</sup> | 2.75×10 <sup>3</sup> | 6 | 5.89×10 <sup>2</sup> | 8.97×10 <sup>2</sup> | 6 | 4.24×10 <sup>2</sup> | 2.65×10 <sup>2</sup> | 12 |
| 1   | 7.64×10 <sup>2</sup> | 2.97×10 <sup>2</sup> | 6 | 7.95×10 <sup>3</sup> | 2.14×10 <sup>3</sup> | 6 | 5.41×10 <sup>2</sup> | 2.36×10 <sup>2</sup> | 6 | 9.37×10 <sup>2</sup> | 5.16×10 <sup>2</sup> | 12 |
| 2   | 5.07×10 <sup>3</sup> | 5.36×10 <sup>3</sup> | 6 | 7.76×10 <sup>3</sup> | 1.05×10 <sup>3</sup> | 6 | 8.49×10 <sup>2</sup> | 3.99×10 <sup>2</sup> | 6 | 1.35×10 <sup>3</sup> | 7.42×10 <sup>2</sup> | 12 |
| 3   | 7.49×10 <sup>4</sup> | 1.03×10 <sup>5</sup> | 6 | 1.20×10 <sup>4</sup> | 3.24×10 <sup>3</sup> | 6 | 1.86×10 <sup>3</sup> | 6.88×10 <sup>2</sup> | 6 | 2.68×10 <sup>3</sup> | 1.91×10 <sup>3</sup> | 12 |
| 6   | 2.54×10 <sup>6</sup> | 2.57×10 <sup>6</sup> | 6 | 1.42×10 <sup>6</sup> | 1.97×10 <sup>6</sup> | 6 | 7.41×10 <sup>5</sup> | 4.53×10 <sup>5</sup> | 6 | 3.25×10 <sup>5</sup> | 4.51×10 <sup>5</sup> | 12 |
| 7   | 5.23×10 <sup>6</sup> | 4.20×10 <sup>6</sup> | 6 | 4.41×10 <sup>6</sup> | 3.10×10 <sup>6</sup> | 6 | 2.85×10 <sup>6</sup> | 7.33×10 <sup>5</sup> | 6 | 1.60×10 <sup>6</sup> | 1.86×10 <sup>6</sup> | 12 |
| 10  | 9.22×10 <sup>6</sup> | 2.88×10 <sup>6</sup> | 6 | 1.26×10 <sup>7</sup> | 6.42×10 <sup>6</sup> | 6 | 1.68×10 <sup>7</sup> | 1.53×10 <sup>7</sup> | 6 | 6.42×10 <sup>6</sup> | 4.05×10 <sup>6</sup> | 12 |

dpi, days post infection; gc, quantitated genome copy number per RT-qPCR reaction; sd, standard deviation; n, number of replicates (i.e. one independent experiment is composed of three replicates).

**Table S5.** Genome copy numbers obtained from BTV replication kinetics study for reverse engineered (rBTV-1 and rBTV-4) and reassortant (BTV-1<sub>4S2</sub>, BTV-1<sub>4S2S6S7</sub> and BTV-4<sub>1S2S6S7</sub>) strains.

| dpi | BTV-1 <sub>4S2</sub> |                      |   | BTV-1 <sub>4S2S6S7</sub> |                      |   | BTV-4 <sub>1S2S6S7</sub> |                      |   |
|-----|----------------------|----------------------|---|--------------------------|----------------------|---|--------------------------|----------------------|---|
|     | mean gc              | sd                   | n | mean gc                  | sd                   | n | mean gc                  | sd                   | n |
| 0   | 1.50×10 <sup>3</sup> | 8.20×10 <sup>1</sup> | 3 | 5.00×10 <sup>2</sup>     | 2.75×10 <sup>2</sup> | 3 | 3.09×10 <sup>2</sup>     | 1.31×10 <sup>2</sup> | 6 |
| 1   | 2.02×10 <sup>3</sup> | 4.27×10 <sup>2</sup> | 3 | 1.09×10 <sup>3</sup>     | 2.05×10 <sup>2</sup> | 3 | 6.82×10 <sup>2</sup>     | 1.96×10 <sup>2</sup> | 6 |
| 2   | 2.89×10 <sup>3</sup> | 1.99×10 <sup>3</sup> | 3 | 1.19×10 <sup>3</sup>     | 9.70×10 <sup>1</sup> | 3 | 2.23×10 <sup>3</sup>     | 5.65×10 <sup>2</sup> | 6 |
| 3   | 1.38×10 <sup>4</sup> | 6.00×10 <sup>3</sup> | 3 | 5.77×10 <sup>3</sup>     | 3.40×10 <sup>3</sup> | 3 | 8.99×10 <sup>3</sup>     | 5.63×10 <sup>3</sup> | 6 |
| 6   | 1.04×10 <sup>6</sup> | 4.03×10 <sup>5</sup> | 3 | 5.64×10 <sup>5</sup>     | 1.87×10 <sup>5</sup> | 3 | 6.17×10 <sup>5</sup>     | 6.79×10 <sup>5</sup> | 6 |
| 7   | 2.72×10 <sup>6</sup> | 6.14×10 <sup>5</sup> | 3 | 1.39×10 <sup>6</sup>     | 1.92×10 <sup>5</sup> | 3 | 1.80×10 <sup>6</sup>     | 9.68×10 <sup>5</sup> | 6 |
| 10  | 7.03×10 <sup>6</sup> | 1.73×10 <sup>6</sup> | 3 | 4.10×10 <sup>6</sup>     | 2.34×10 <sup>5</sup> | 3 | 3.68×10 <sup>6</sup>     | 1.93×10 <sup>6</sup> | 6 |

dpi, days post infection; gc, quantitated genome copy number per RT-qPCR reaction; sd, standard deviation; n, number of replicates (i.e. one independent experiment is composed of three replicates).

**Table S6.** Deviance information criterion (DIC) for models assessing variation amongst BTV strains in replication curve parameters.

| Model*           |               |               |                    |              |
|------------------|---------------|---------------|--------------------|--------------|
| Replication rate | Asymptote     |               | Initial no. copies | DIC†         |
|                  | Lower         | Upper         |                    |              |
| common           | common        | common        | common             | 560.7        |
| varies           | common        | common        | common             | 474.6        |
| common           | varies        | common        | common             | 451.5        |
| common           | common        | varies        | common             | 531.2        |
| common           | common        | common        | varies             | 423.6        |
| varies           | varies        | common        | common             | 411.4        |
| varies           | common        | varies        | common             | 468.9        |
| varies           | common        | common        | varies             | 323.0        |
| common           | varies        | varies        | common             | 443.0        |
| common           | varies        | common        | varies             | 290.6        |
| common           | common        | varies        | varies             | 402.3        |
| varies           | varies        | varies        | common             | 411.9        |
| <b>varies</b>    | <b>varies</b> | <b>common</b> | <b>varies</b>      | <b>251.2</b> |
| varies           | common        | varies        | varies             | 317.5        |
| common           | varies        | varies        | varies             | 272.9        |
| varies           | varies        | varies        | varies             | 249.6‡       |

\*, “common”: parameter common to all strains; “varies”: parameter varies amongst strains;

†, a model with a lower DIC is preferred to one with higher DIC;

‡, although this model has a smaller DIC than the one shown in bold, the difference is less than two and the simpler model was preferred as it has the smaller number of parameters.

**Table S7.** Comparison of posterior distributions of replication rates and time of maximum replication between BTV strains in KC cells.

| <b>Replication rate</b>                                 | <b>Time of maximum replication</b>                      |
|---------------------------------------------------------|---------------------------------------------------------|
| <b>wtBTV-4 &gt; wtBTV-1 (P=0.03)</b>                    | <b>wtBTV-4 &gt; wtBTV-1 (P&lt;0.001)</b>                |
| <b>rBTV-1 &gt; wtBTV-1 (P=0.003)</b>                    | <b>rBTV-1 &gt; wtBTV-1 (P&lt;0.001)</b>                 |
| rBTV-4 = wtBTV-4 (P=0.06)                               | rBTV-4 = wtBTV-4 (P=0.78)                               |
| rBTV-1 = wtBTV-4 (P=0.55)                               | rBTV-1 = wtBTV-4 (P=0.20)                               |
| <b>rBTV-4 &lt; rBTV-1 (P=0.01)</b>                      | <b>rBTV-4 &gt; rBTV-1 (P=0.02)</b>                      |
| BTV-1 <sub>4S2</sub> = rBTV-1 (P=0.05)                  | BTV-1 <sub>4S2</sub> < rBTV-1 (P=0.05)                  |
| BTV-1 <sub>4S3</sub> = rBTV-1 (P=0.60)                  | <b>BTV-1<sub>4S3</sub> &lt; rBTV-1 (P&lt;0.001)</b>     |
| BTV-1 <sub>4S9</sub> = rBTV-1 (P=0.39)                  | <b>BTV-1<sub>4S9</sub> &lt; rBTV-1 (P&lt;0.001)</b>     |
| <b>BTV-1<sub>4S2S6S7</sub> &lt; rBTV-1 (P=0.01)</b>     | BTV-1 <sub>4S2S6S7</sub> = rBTV-1 (P=0.16)              |
| <b>BTV-4<sub>1S2S6S7</sub> &lt; rBTV-1 (P&lt;0.001)</b> | <b>BTV-4<sub>1S2S6S7</sub> &lt; rBTV-1 (P=0.004)</b>    |
| BTV-1 <sub>4S2</sub> = rBTV-4 (P=0.53)                  | <b>BTV-1<sub>4S2</sub> &lt; rBTV-4 (P=0.001)</b>        |
| BTV-4 <sub>1S3</sub> = rBTV-4 (P=0.50)                  | <b>BTV-4<sub>1S3</sub> &lt; rBTV-4 (P&lt;0.001)</b>     |
| BTV-4 <sub>1S9</sub> = rBTV-4 (P=0.13)                  | <b>BTV-4<sub>1S9</sub> &lt; rBTV-4 (P=0.03)</b>         |
| <b>BTV-4<sub>1S2S6S7</sub> &lt; rBTV-4 (P=0.02)</b>     | <b>BTV-4<sub>1S2S6S7</sub> &lt; rBTV-4 (P&lt;0.001)</b> |
